# Supplementary material for: Genome mining of 2-phenylethanol biosynthetic genes from Enterobacter sp. CGMCC 5087 and heterologous overproduction in Escherichia coli
Source: PubMed Central journal article supplement (PMC6223000; doi:10.1186/s13068-018-1297-3), 2018-11-08

# S1

**KDC4427** 1 **M**R**T**P**Y**C**V**-----**A**D**Y**L**L**D**R**L**T**D**C**G**A**D**H**L**F**G**V**P**G**D**Y**N**L**Q**F**L**D**H**V**I 39  
**ARO10** 1 **M**-**A**P**V**T**I**E**K**F**V**N**Q**E**E**R**H**L**V**S**N**R**S**A**T**I**P**F**G**E**Y**I**F**K**R**L**L**S**I**D**T**K**S**V**F**G**V**P**G**D**F**N**L**S**L**L**E**Y**L**Y 59

**KDC4427** 40 D - - - **S**P**D**I**C****W**V**G**C**A**M**E**L**N**A**S**Y**A**A**D**G**Y**A**R**C**K**G - **F**A**A**L**L**T**T**F**G**V**G**E**L**S**A**M**N**G**I**A**G**S**Y**A**E**H**V** 94  
**ARO10** 60 **S**P**S**V**E**S**A**G**L**R**W**V**G**T**C**M**E**L**N**A**A**Y**A**A**D**G**S**R**Y**S**N**K**I**G**C**L**I**T**T**Y**G**V**G**E**L**S**A**L**N**G**I**A**G**S**F**A**E**N**V** 119

**KDC4427** 95 **P**V**L**H**I**V**G**-----**A**P**G**T**A**S**Q**R**G**E**L**L**H**H**T**-**L**G**D**G**E**F**R**H-----**F**Y**H**M**S**E**P**I**T**V**A**Q**A**I 139  
**ARO10** 120 **K**V**L**H**I**V**G**V**A**K**S**I**D**S**R**S**S**N**F**S**D**R**N**---**L**H**H**L**V**P**Q**L**H**D**S**N**F**K**G**P**N**H**K**V**Y**H**D**M**V**K**D**R**V**A**C**S**V**A 176

**KDC4427** 140 **L**T**E**-**Q**N**A**C**Y**E**I**D**R**V**L**T**T**M**L**R**E**R**R**P**G**Y**L**M**L**P**A**D**V**A**K**K**A**A**T**P**P**V**N**A**L**T**L**R**H**A**H**A**D**S**A**C--- 194  
**ARO10** 177 **Y**L**E**D**I**E**T**A**C**D**Q**V**D**N**V**I**R**D**I**Y**K**Y**S**K**P**G**Y**I**F**V**P**A**D**F**A**D**M**S**V**T**C**D**N**L**V**N**V**P**R**I**S**Q**Q**D**C**I**V**Y**P**S 236

**KDC4427** 194 - - - **L**K**A**F**R**D**A**A**E**N**R**L**A**M**S**K**R**T**A**L**L**A**D**F**L**V**L**R**H**G**L**K**H**A**L**Q**K**W**V**K**D**V**P**M**A**H**A**T**M**L**M**G**K**G**I**F**D** 251  
**ARO10** 237 **E**N**Q**L**S**D**I**I**N**K**I**T**S**W**I**Y**S**S**K**T**P**A**I**L**G**D**V**L**T**D**R**Y**G**V**S**N**F**L**N**K**L**I**C**K**T**G**I**W**F**S**T**V**M**G**K**S**V**I**D** 296

**KDC4427** 252 **E**R**H**V**G**F**Y**G**T**Y**S**G**S**A**S**A**G**A**V**K**E**A**I**E**G**A**D**T**V**L**C**I**G**T**R**F**T**D**T**L**T**A**G**F**T**H**Q**L**T**P-**S**Q**T**I**E**V**Q**P**H** 310  
**ARO10** 297 **E**S**N**P**T**Y**M**G**Q**Y**N**G**K**E**G**L**K**Q**V**Y**E**H**F**E**L**C**D**L**V**L**H**F**G**V**D**I**N**E**I**N**N**G**H**Y**T**F**T**Y**K**P**N**A**K**I**I**Q**F**H**P**N 356

**KDC4427** 311 **A**S**R**V**G**D**V**W**F**T**G**I**P**M**L**Q**A**I**E**---**T**L**V**E**L**C**K**-----**Q**H**V**H**D**T**P**V**P**S**S**Q**S**A**M**V**Y**P**Q**P**D**G 358  
**ARO10** 357 **Y**I**R**L**V**D**T**R**Q**G**N**E**Q**M**F**K**G**I**N**F**A**P**I**L**K**E**L**Y**K**R**I**D**V**S**K**L**S**L**Q**Y**D**S**N**V**T**Q**Y**T**N**E**T**M**R**L**E**D**P**T**N**G 416

**KDC4427** 359 S - - - **L**T**Q**D**W**F**W**K**T**L**Q**T**F**I**R**P**G**D**I**L**A**D**Q**G**T**S**A**F**G**A**I**D**L**R**L**P**A**D**V**N**F**I**V**Q**P**L**W**G**S**I**G**Y**T**L**A** 415  
**ARO10** 417 **Q**S**S**I**I**T**Q**V**H**L**Q**K**T**M**P**K**F**L**N**P**G**D**V**V**C**E**T**G**S**F**Q**F**S**V**R**D**F**A**F**P**S**Q**L**K**Y**I**S**Q**G**F**F**L**S**I**G**M**A**L**P** 476

**KDC4427** 416 **A**A**F**G**A**Q**T**A**C**P**N**R-----**R**V**I**V**L**T**G**D**G**A**A**Q**L**T**I**Q**E**L**G**S**M**L**R**D**K**Q**H**P**I**L**V** 459  
**ARO10** 477 **A**A**L**G**V**G**I**A**M**Q**D**H**S**N**A**H**I**N**G**G**N**V**K**E**D**Y**K**P**R**L**I**L**F**E**G**D**G**A**A**Q**M**T**I**Q**E**L**S**T**I**L**K**C**N**I**P**L**E**V**I**I 536

**KDC4427** 460 **L**N**N**E**G**Y**T**V**E**R**A**I**H**G**P**E**Q**R**Y**N**D**I**A**L**W**N**W**T**Q**I**P**Q**A**L-----**S**L**D**P**Q**A**Q**C**W**R**V**S**E**A**E**Q**L** 510  
**ARO10** 537 **W**N**N**G**Y**T**I**E**R**A**I**M**G**P**T**R**S**Y**N**D**V**M**S**W**K**W**T**K**L**F**E**A**F**G**D**F**D**G**K**Y**T**N**S**T**L**I**Q**C**P**S**K**L**A**L**K**L**E**E**L** 596

**KDC4427** 511 **A**D**V**L**E**K**V**A**H**H**E**R**L**S**L**I**E**V**M**L**P**K**A**D**I**P**P**L**L**G**A**I**T**K**A**L**E**A-**R**N**S**A 552  
**ARO10** 597 **K**N**S**N**K**R**S**G---**I**E**L**L**E**V**K**L**G**E**L**D**F**P**E**Q**L**K**C**M**V**E**A**A**A**L**K**R**N**K**K** 635

# S2

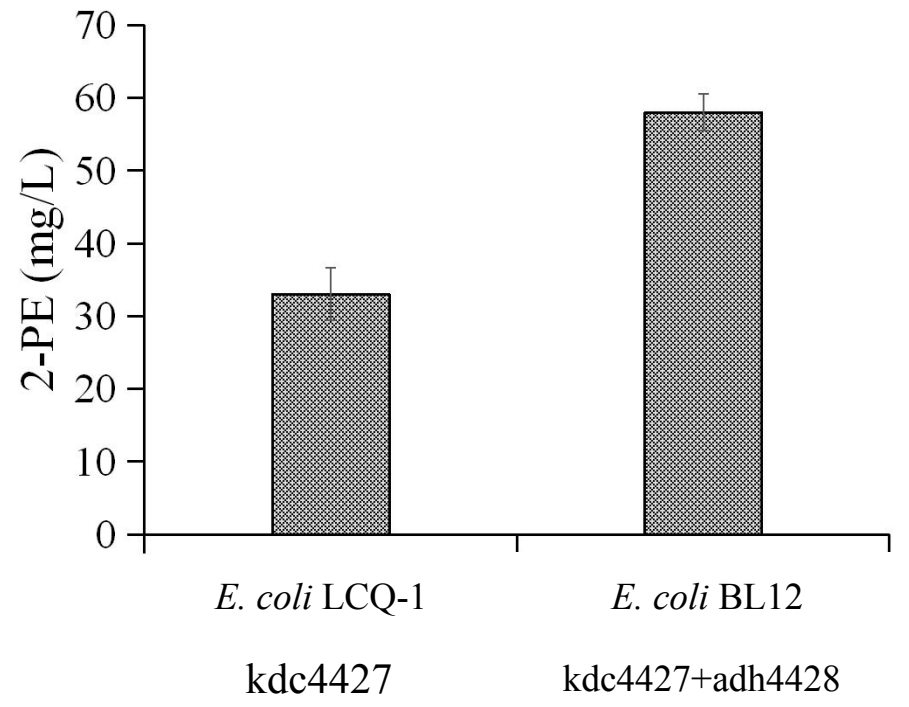

Supplement: 13068_2018_1297_MOESM1_ESM.pdf [file 13068_2018_1297_MOESM1_ESM.pdf]
